# Supplementary material for: Nanoparticles of molecule-based conductors
Source: Royal Society of Chemistry journal article supplement (doi:10.1039/c3nj00555k), 2013-01-01

# NJC Electronic Supplementary Information for Nanoparticles of Molecule-based Conductors

Dominique de Caro,\* Lydie Valade,\* Christophe Faulmann, Kane Jacob, Diane Van Dorsselaer, Imane Chtioui, Lionel Salmon, Abdelaziz Sabbar, Souad El Hajjaji, Emile Pérez, Sophie Franceschi and Jordi Fraxedas.

Correspondence to: [dominique.decaro@lcc-toulouse.fr](mailto:dominique.decaro@lcc-toulouse.fr), [lydie.valade@lcc-toulouse.fr](mailto:lydie.valade@lcc-toulouse.fr)

## This file includes:

### Characterization equipment

#### Characterization data for:

- S1. TTF·TCNQ in presence of *n*-dodecylammoniumlactobionate, PEG 400 and Triton X.
- S2. TTF[Ni(dmit)<sub>2</sub>]<sub>2</sub> in presence of *n*-dodecylammoniumlactobionate, PEG 400 and Triton X.
- S3. TTFCl<sub>0.77</sub> in presence of CH<sub>3</sub>(*n*-C<sub>8</sub>H<sub>17</sub>)<sub>3</sub>NCl
- S4. TTFBr<sub>0.59</sub> in presence of (*n*-C<sub>8</sub>H<sub>17</sub>)<sub>4</sub>NBr
- S5. BEDT-TTFCl<sub>0.66</sub> in presence of CH<sub>3</sub>(*n*-C<sub>8</sub>H<sub>17</sub>)<sub>3</sub>NCl.
- S6. (BEDT-TTF)<sub>2</sub>Br in presence of (*n*-C<sub>8</sub>H<sub>17</sub>)<sub>4</sub>NBr.

### Characterization equipment

TEM and HRTEM observations have been performed at TEMSCAN (Université Paul Sabatier in Toulouse), on a Jeol JEM-1011 at 100 kV and on a Jeol-JEM-2100F at 200 kV for the high-resolution images.

Infrared spectra were taken at room temperature on a Perkin Elmer Spectrum GX spectrophotometer. Raman measurements were performed using a LabRAM-HR800 (Jobin Yvon) setup. The spectra are obtained at the temperature of liquid nitrogen using the 632.8 nm line of a He-Ne laser.

Powder X-ray diffraction pattern are collected on a XPert Pro ( $\theta$ - $\theta$  mode) Panalytical diffractometer with  $\lambda$  (Cu K <sub>$\alpha$ 1</sub>, K <sub>$\alpha$ 2</sub>) = 1.54059, 1.54439 Å. The extraction of peak positions for indexing is performed with the fitting program, available in the PC software package Highscore+ supplied by Panalytical. Pattern indexing is carried out by means of the DICVOL program implemented in the Highscore+ package. The powder X-ray diffraction pattern is compared with the simulated pattern calculated using single crystal data from TTFTCQ01/IUCr A10935 file for TTF·TCNQ, CETPEW10 file for TTF[Ni(dmit)<sub>2</sub>]<sub>2</sub>, MTTFCL file for TTFCl<sub>0.77</sub>, and ZZZBGJ file for TTFBr<sub>0.59</sub>.

XPS measurements were performed with a PHOIBOS 150 hemispherical analyzer at the Institut de Tècniques Energètiques of the Politechnical University of Barcelona with a pass energy of 10 eV and using nonmonochromatized AlK $\alpha$  (1486.6 eV) radiation.

The room-temperature conductivity of the samples was measured on compressed pellets by two-probe contacts using a home-made equipment.

### S1. TTF·TCNQ

IR and XRD spectra of the nanoparticles obtained in presence of *n*-dodecyl ammoniumlactobionate, PEG 400 and Triton X are identical to those of nanoparticles obtained in presence of ionic liquids.<sup>1</sup>

Raman is identical to that described in presence of ionic liquids.<sup>2</sup>

### S2. TTF[Ni(dmit)<sub>2</sub>]<sub>2</sub>

IR and XRD spectra of the nanoparticles obtained in presence of *n*-dodecyl ammoniumlactobionate, PEG 400 and Triton X are identical to those of nanoparticles obtained in presence of ionic liquids.<sup>1</sup>

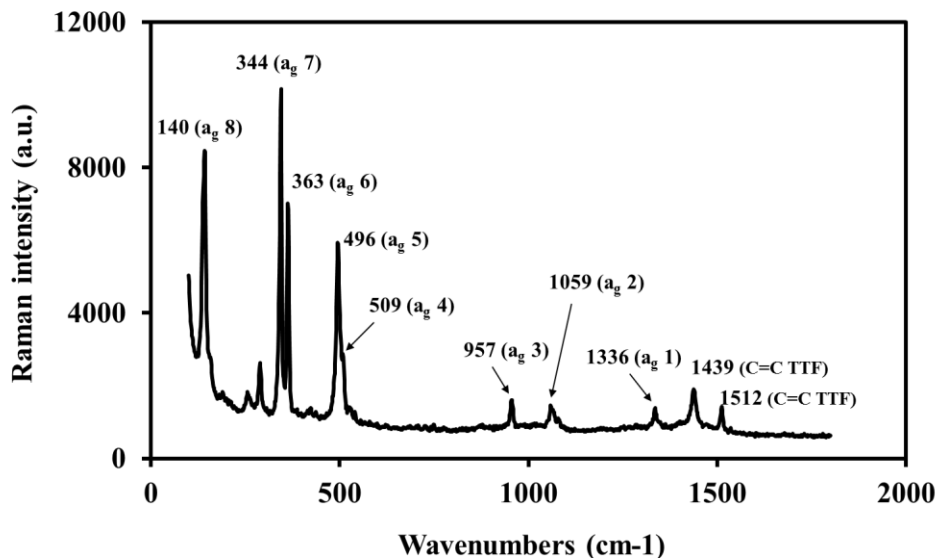

Raman spectrum of TTF[Ni(dmit)<sub>2</sub>]<sub>2</sub> nanoparticles obtained in all media.

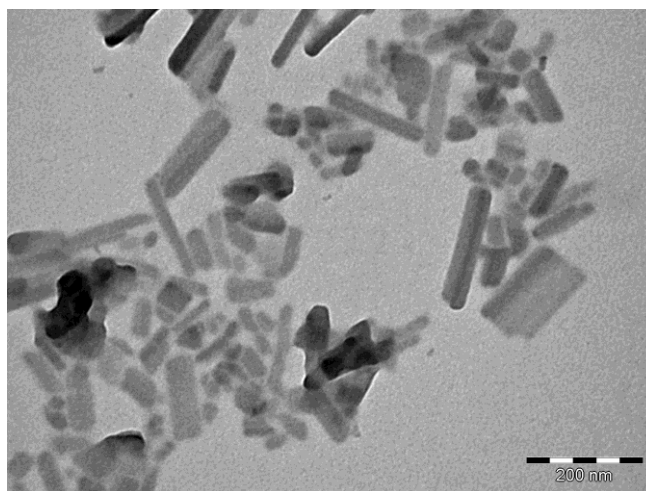

Nanosticks of TTF[Ni(dmit)<sub>2</sub>]<sub>2</sub> obtained in presence of *n*-dodecylammoniumlactobionate

<sup>1</sup> D. de Caro, K. Jacob, M. Souque and L. Valade, in *Vibrational Spectroscopy*, ed. D. de Caro, INTECH, 2012, pp. 141-152.

<sup>2</sup> D. de Caro, K. Jacob, C. Faulmann, J.-P. Legros, F. Senocq, J. Fraxedas and L. Valade, *Synth. Met.*, 2010, 160, 1223-1227.

S3.  $\text{TTfCl}_{0.77}$  in presence of  $\text{CH}_3(n\text{-C}_8\text{H}_{17})_3\text{NCl}$ : Raman and XRD

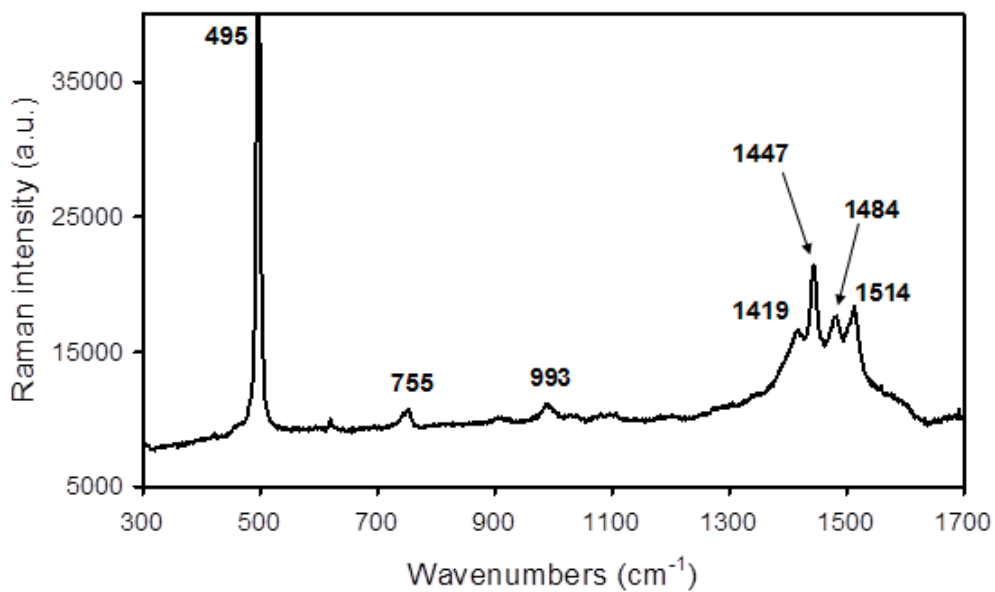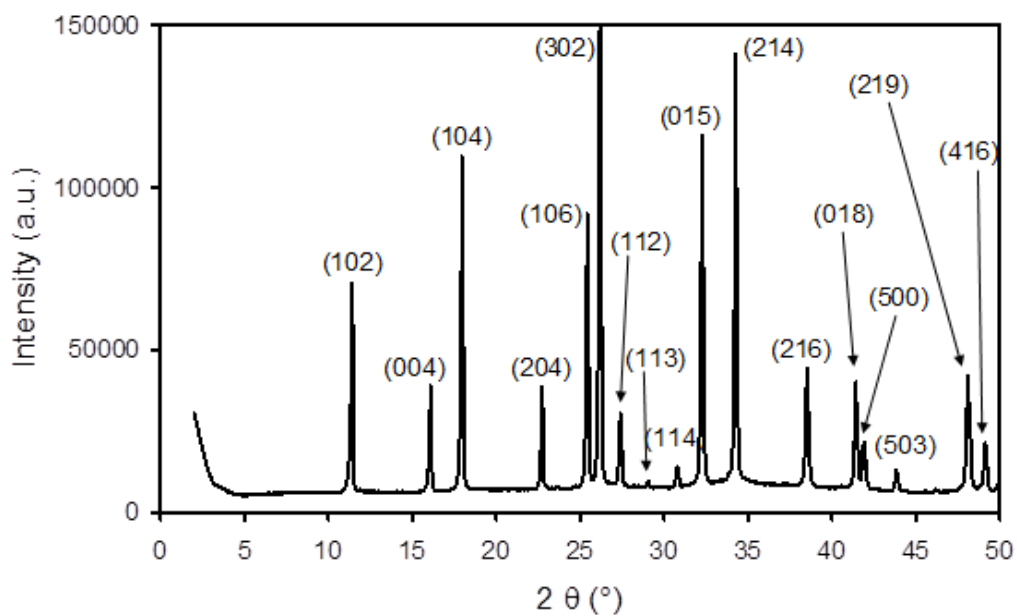

S4. TTFBr<sub>0.59</sub> in presence of (*n*-C<sub>8</sub>H<sub>17</sub>)<sub>4</sub>NBr: Raman and XRD.

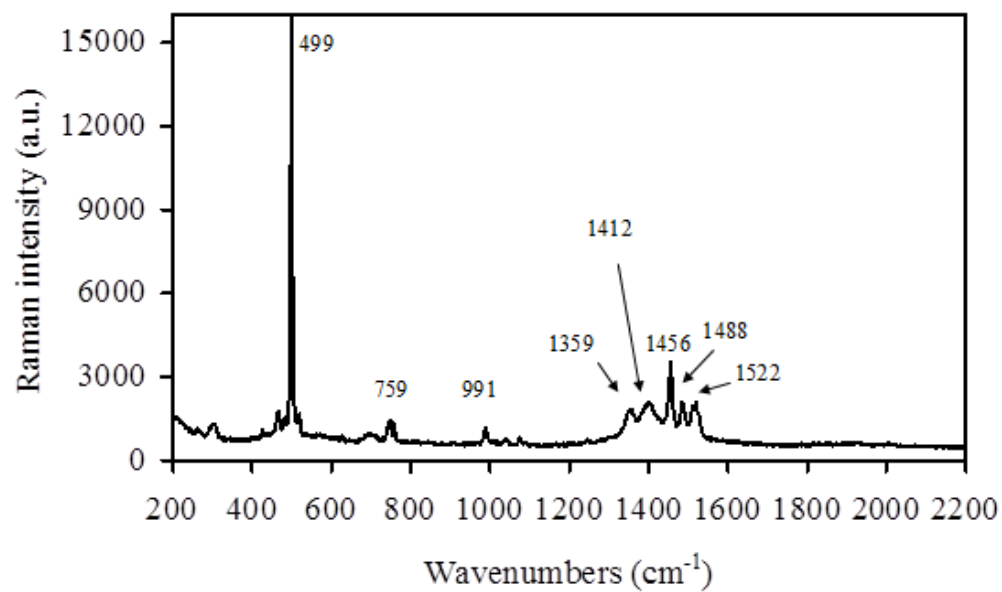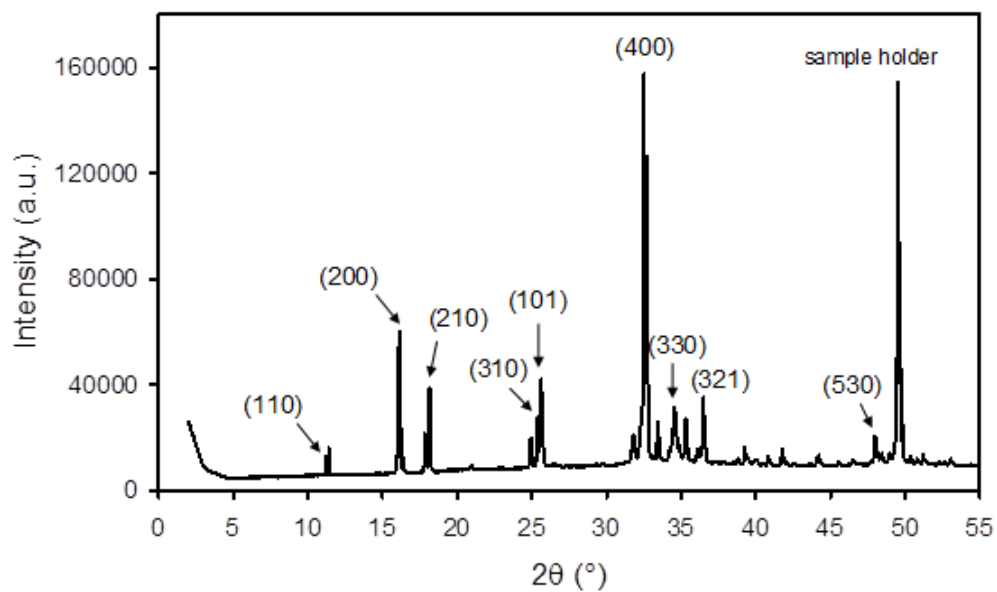

S5. BEDT-TTFCl<sub>0.66</sub> in presence of CH<sub>3</sub>(*n*-C<sub>8</sub>H<sub>17</sub>)<sub>3</sub>NCl: Raman.

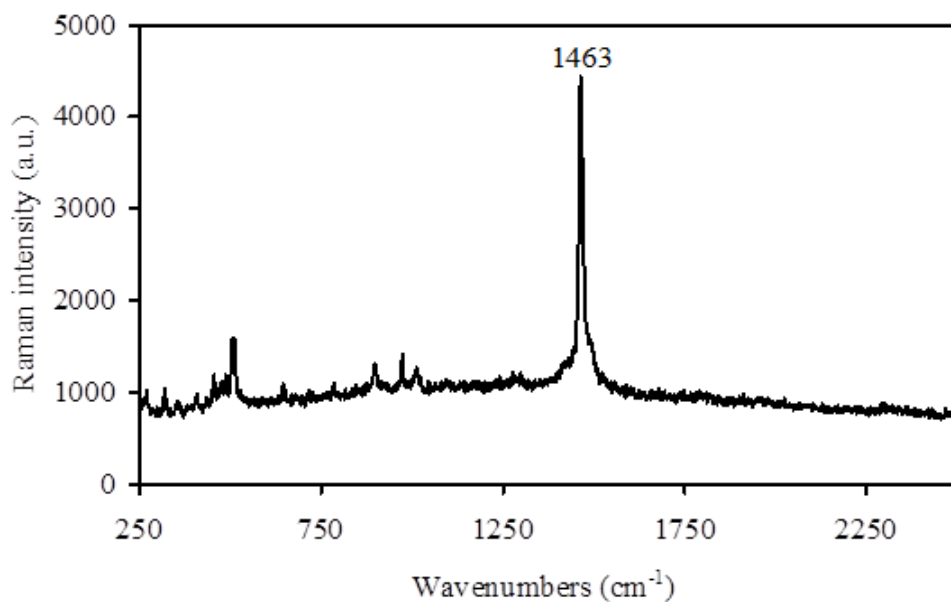

S6. (BEDT-TTF)<sub>2</sub>Br in presence of (*n*-C<sub>8</sub>H<sub>17</sub>)<sub>4</sub>NBr: Raman.

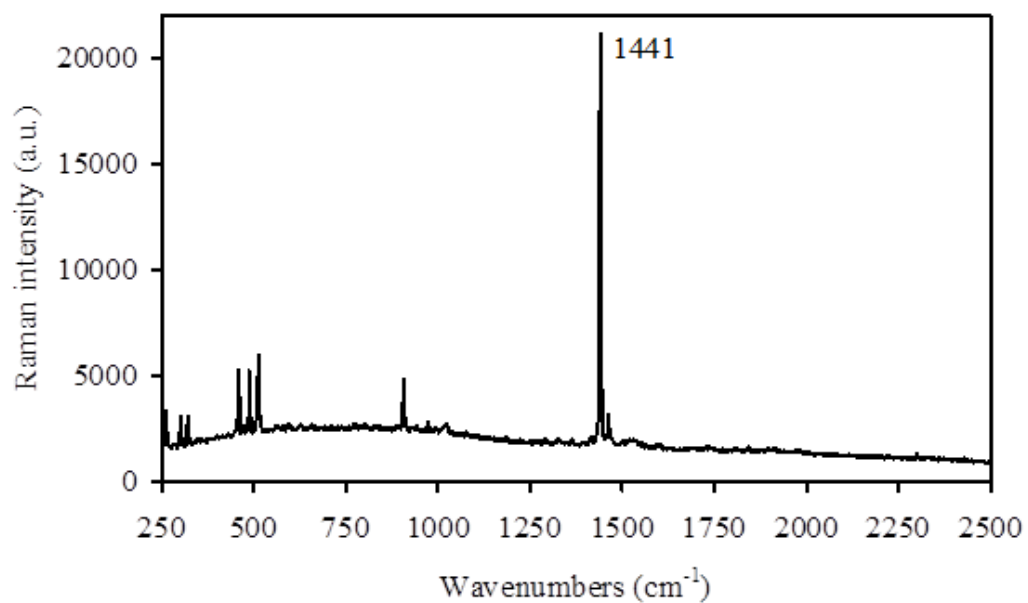

Supplement: c3nj00555k.pdf [file c3nj00555k.pdf]
